# Supplementary material
Source: PubMed Central journal article supplement (PMC4496425)
Supplement: NIHMS699356-supplement-a.pdf [file NIHMS699356-supplement-a.pdf]

Supplementary Table 1: N-linked glycosite identifications by Lec, Lec+Lec, and LecSPEG method

| Protein name                            | Peptide sequence        | SNA | SNA+SNA |
|-----------------------------------------|-------------------------|-----|---------|
| Afamin                                  | DIENFnSTQK              |     |         |
| Afamin                                  | YAEDKFnETTEK            |     |         |
| Alpha-1-acid glycoprotein 1             | LVPVPITnATLNQITGK       |     |         |
| Alpha-1-acid glycoprotein 1             | QNQcIYnTTYLNVQR         |     |         |
| Alpha-1-acid glycoprotein 2             | LVPVPITnATLNR           |     |         |
| Alpha-1-acid glycoprotein 2             | QNQcFYnSSYLNVQR         |     |         |
| Alpha-1-antichymotrypsin                | FnLTETSEAEIHQSFQHLLR    | 1   |         |
| Alpha-1-antichymotrypsin                | YTGnASALFILPNQNK        |     |         |
| Alpha-1-antitrypsin                     | YLGnATAIFFLPNEGK        |     |         |
| Alpha-2-HS-glycoprotein                 | cQNcPLLAPLnNTR          |     |         |
| Alpha-2-HS-glycoprotein                 | NAQNnGSNFQLEEISR        |     | 1       |
| Alpha-2-HS-glycoprotein                 | VcQDcPLLAPLnDTR         |     |         |
| Alpha-2-macroglobulin                   | InTTNVmGTSLTVR          |     |         |
| Apolipoprotein B                        | FnSSYLQGTNQITGR         |     |         |
| Apolipoprotein B                        | FVEGSHnSTVSLTTK         |     |         |
| Apolipoprotein B                        | YDFnSSmLYSTAK           |     |         |
| Apolipoprotein D                        | ADGTVNQIEGEATPVnLTEPAK  |     |         |
| Apolipoprotein H                        | LGnWSAmPScK             |     |         |
| Apolipoprotein H                        | VYKPSAGnNSLYR           |     |         |
| Attractin isoform 2                     | IDSTGnVTNELR            |     |         |
| Beta-2-glycoprotein 1                   | LGnWSAmPScK             |     | 1       |
| Beta-2-glycoprotein 1                   | VYKPSAGnNSLYR           |     | 1       |
| Biotinidase                             | FnDTEVLQR               |     |         |
| Butyrylcholinesterase                   | DnNSIITR                |     |         |
| Butyrylcholinesterase                   | EnETEIIK                |     |         |
| Ceruloplasmin                           | EHEGAIYPnnTTnFQR        |     |         |
| Ceruloplasmin                           | EnLTAPGSNSAVFFEQGTTR    |     |         |
| Clusterin isoform 2                     | EDALnETR                |     |         |
| Clusterin                               | LAnLTQGENQYYLR          |     |         |
| Clusterin isoform 2                     | mFSQnDTR                |     |         |
| Clusterin isoform 2                     | KEDALnETR               |     |         |
| Coagulation factor XI                   | GINYnSSVAK              |     |         |
| Coagulation factor XI                   | VYSGILnQSEIK            |     |         |
| Coagulation factor VII (serum prothromb | EEQYnSTYR               |     |         |
| Complement component 4A                 | FSDGLESnSSTQFEVK        |     |         |
| Complement component 4A                 | GLnVTLSSSTGR            |     |         |
| Complement component 6                  | VLnFTTK                 |     |         |
| Complement factor H                     | ISEEnETTcYmGK           |     |         |
| Complement factor H                     | mNGASnVTcINSR           |     |         |
| Complement factor H-related protein 2   | LQNNENnIScVER           |     |         |
| Complement factor I                     | FLNnGTcTAEGK            |     |         |
| FLJ00385 protein                        | EEQFnSTFR               |     | 1       |
| Galectin-3-binding protein              | AAIPSALDTnSSK           |     |         |
| Haptoglobin isoform 2                   | NLFLnHSEnATAK           |     |         |
| Haptoglobin isoform 2                   | VVLHPnYSQVDIGLIK        |     |         |
| Hemopexin                               | ALPQPQnVTSLLGcTH        |     |         |
| Hemopexin                               | SWPAVGncSSALR           |     | 1       |
| Heparin cofactor II                     | DFVnASSK                |     |         |
| Histone deacetylase 5 isoform 3         | mnSPnESADGmSGR          |     |         |
| HP protein                              | NLFLnHSEnATAK           |     | 2       |
| HP protein                              | VVLHPnYSQVNIGLIK        |     |         |
| IGHA1 protein                           | LSLHRPALENLLLGSEAnLTcTI | 1   |         |

|                                                        |                           |          |           |
|--------------------------------------------------------|---------------------------|----------|-----------|
| IGHM protein                                           | EEQYnSTYR                 |          | 1         |
| Immunoglobulin J chain                                 | EnISNPTSPLR               |          | 2         |
| Insulin-like growth factor-binding protein             | ALGFEnATQALGR             |          |           |
| Inter-alpha (globulin) inhibitor H4 isoform            | LPTQnITFQTESSVAEQEAEFQSPK |          |           |
| Inter-alpha globulin inhibitor H2 polypeptide          | GAFISnFSmTVDGK            |          |           |
| Inter-alpha-trypsin inhibitor heavy chain 1            | AnLSSQALQm                |          | 2         |
| Inter-alpha-trypsin inhibitor heavy chain 2            | GAFISnFSmTVNGK            |          | 2         |
| Kininogen-1                                            | ITYSIVQTncSK              |          |           |
| Kininogen-1                                            | LNAENnATFYFK              |          |           |
| Kininogen-1 isoform 2                                  | YNSQnQSNNQFVLYR           |          |           |
| KNG1 Isoform LMW of Kininogen-1                        | mTYSIVQTncSK              |          | 1         |
| Lymphatic vessel endothelial hyaluronidase             | ANQQLnFTEAK               |          |           |
| NFX1-type zinc finger-containing protein               | HDQEnDTR                  |          |           |
| Orosomucoid 1                                          | EnGTISR                   |          |           |
| Orosomucoid 2                                          | EnGTVSR                   |          |           |
| Paraoxonase 1                                          | VTQVYAEEnGTVLQGSTVASVYK   |          |           |
| Plasma protease C1 inhibitor                           | NPnATSSSSQNPELQNR         |          | 2         |
| Prothrombin                                            | GHVnITR                   |          |           |
| Putative uncharacterized protein DKFZ103010.1          | TPLTAnITK                 |          | 2         |
| Serine (or cysteine) proteinase inhibitor              | ETFFnLSK                  |          |           |
| Serine (or cysteine) proteinase inhibitor              | FLnDTmAVYEAK              |          |           |
| Serine proteinase inhibitor, clade A, member 1         | YLGnATAIFFLPDEGK          |          |           |
| Serotransferrin                                        | QQQHFLFGSnVTncSGN         |          | 1         |
| Serpin peptidase inhibitor, clade A, member 1          | TLnQSSDELQLSmGNAmFVK      |          |           |
| Serpin peptidase inhibitor, clade A, member 2          | YTGnASALFILPDQDK          |          |           |
| Serpin peptidase inhibitor, clade G, member 1          | DTFVnASR                  |          |           |
| Solute carrier family 1 (glial high affinity) member 1 | VqnITK                    |          |           |
| Vitronectin                                            | nGSLFAFR                  |          |           |
| Vitronectin                                            | NnATVHEQVGGPSLTSDLQAQSK   |          |           |
|                                                        |                           |          |           |
| <b>Total glycoside spectral count</b>                  |                           | <b>2</b> | <b>20</b> |

Notes:

Lower case letters: modified amino acids. m for oxidized Met; n for deaminated Asn after PNGase F releasing

| SNA+SNA+SPEG | AAL | AAL+AAL | AAL+AAL+SPEG | WGA | WGA+WGA |
|--------------|-----|---------|--------------|-----|---------|
| 2            |     |         | 2            |     |         |
|              |     |         | 1            |     |         |
| 5            |     |         |              |     |         |
| 5            |     |         |              |     |         |
| 4            |     |         |              |     |         |
| 3            |     |         |              |     |         |
|              |     |         |              |     |         |
| 4            |     |         |              |     |         |
| 8            |     |         |              |     |         |
| 4            |     |         |              |     |         |
| 2            |     |         | 2            |     |         |
|              |     |         |              |     |         |
| 2            |     |         |              |     |         |
| 2            |     |         | 2            |     |         |
| 2            |     |         | 3            |     |         |
| 2            |     | 1       | 2            |     |         |
|              |     |         | 5            |     | 1       |
|              |     |         | 1            |     |         |
|              |     | 1       | 2            |     | 1       |
|              |     |         | 1            |     |         |
|              |     |         |              |     |         |
| 2            |     |         |              |     |         |
|              |     |         | 1            |     |         |
|              |     |         | 1            |     |         |
|              |     |         | 2            |     |         |
| 7            |     |         | 3            |     |         |
| 2            |     |         | 3            |     |         |
|              |     |         | 6            |     |         |
| 2            |     | 1       | 2            |     | 1       |
|              |     |         | 1            |     |         |
|              |     |         | 3            |     |         |
|              |     |         | 2            |     |         |
|              |     |         | 1            |     |         |
| 1            |     |         |              |     |         |
|              |     | 1       | 2            |     |         |
|              |     |         | 2            |     |         |
| 2            |     |         | 1            |     |         |
| 2            |     |         | 2            |     |         |
|              |     |         |              |     |         |
|              |     |         | 1            |     |         |
| 1            |     |         |              |     |         |
|              |     |         | 2            |     |         |
|              |     | 2       | 13           |     | 3       |
|              |     | 1       | 1            |     | 2       |
| 1            |     | 2       | 2            |     |         |
|              |     | 1       |              |     |         |
|              |     |         | 3            |     |         |
|              |     |         |              |     |         |
| 23           |     |         |              |     |         |
| 2            |     |         |              |     |         |
|              |     |         |              |     |         |

|            |          |           |            |          |           |
|------------|----------|-----------|------------|----------|-----------|
|            |          |           |            |          |           |
| 2          |          |           | 2          |          |           |
|            |          |           | 2          |          |           |
|            |          |           |            |          |           |
|            |          |           | 2          |          |           |
| 2          |          |           |            |          |           |
| 2          |          |           |            |          |           |
| 4          |          | 1         | 2          |          | 1         |
| 2          |          |           | 4          |          |           |
|            |          |           | 2          |          |           |
|            |          |           |            |          |           |
|            |          |           | 1          |          |           |
|            |          |           |            |          |           |
|            |          |           | 1          |          |           |
|            |          | 8         |            |          | 1         |
|            |          |           | 1          |          |           |
| 2          |          |           |            |          |           |
|            |          |           |            |          |           |
|            |          |           |            |          |           |
|            |          |           | 1          |          |           |
|            |          |           | 2          |          |           |
|            |          | 1         | 1          |          | 1         |
|            |          |           |            |          |           |
|            |          | 1         | 2          |          |           |
|            |          |           |            |          |           |
|            |          |           | 2          |          |           |
|            |          |           |            |          |           |
|            |          |           | 2          |          |           |
|            |          |           | 2          |          |           |
|            |          |           |            |          |           |
| <b>104</b> | <b>0</b> | <b>21</b> | <b>104</b> | <b>0</b> | <b>11</b> |

of glycans from the formerly N-linked glycosites; c for carboxymethyl Cys

**WGA+WGA+SPEG**

|   |
|---|
|   |
|   |
|   |
|   |
|   |
|   |
|   |
|   |
|   |
|   |
| 1 |
|   |
|   |
| 2 |
| 1 |
| 2 |
| 3 |
| 1 |
| 1 |
| 1 |
|   |
|   |
|   |
| 1 |
| 1 |
|   |
|   |
| 9 |
| 2 |
|   |
| 2 |
|   |
|   |
|   |
|   |
| 1 |
| 1 |
| 2 |
| 1 |
|   |
| 1 |
|   |
|   |
| 6 |
| 1 |
|   |
|   |
| 2 |
| 1 |
|   |
|   |
|   |

|           |
|-----------|
|           |
| 1         |
|           |
|           |
|           |
|           |
|           |
| 2         |
| 2         |
|           |
|           |
|           |
|           |
|           |
|           |
|           |
| 1         |
|           |
|           |
| 1         |
| 1         |
|           |
|           |
|           |
| 3         |
| 1         |
|           |
| 1         |
|           |
|           |
| <b>56</b> |
