# Supplementary material
Source: PubMed Central journal article supplement (PMC4496425)
Supplement: NIHMS699356-supplement-c.pdf [file NIHMS699356-supplement-c.pdf]

Supplementary Table 3: The distribution of glycan forms of individual glycopeptides with different lectin binding sp

| Protein name                          | Peptide sequence       | Fuca1-2,3,4 (AAL) | Neu5Acα (SNA) |
|---------------------------------------|------------------------|-------------------|---------------|
| Afamin                                | DIENFnSTQK             | √                 | √             |
| Afamin                                | YAEDKFnETTEK           | √                 |               |
| Alpha-1-acid glycoprotein 1           | LVPVPITnATLNQITGK      |                   | √             |
| Alpha-1-acid glycoprotein 1           | QNQcIYnTTYLNVQR        |                   | √             |
| Alpha-1-acid glycoprotein 2           | LVPVPITnATLNR          |                   | √             |
| Alpha-1-acid glycoprotein 2           | QNQcFYnSSYLNVQR        |                   | √             |
| Alpha-1-antichymotrypsin              | YTGnASALFILPNQNK       |                   | √             |
| Alpha-1-antitrypsin                   | YLGNATAIFFLPNEGK       |                   | √             |
| Alpha-2-HS-glycoprotein               | cQNcPLLAPLnNTR         |                   | √             |
| Alpha-2-HS-glycoprotein               | NAQNnGSNFQLEEISR       | √                 | √             |
| Alpha-2-macroglobulin                 | InTTNVmGTSLTVR         |                   | √             |
| Apolipoprotein B                      | FnSSYLQGTNQITGR        | √                 | √             |
| Apolipoprotein B                      | FVEGSHnSTVSLTTK        | √                 | √             |
| Apolipoprotein B                      | YDFnSSmLYSTAK          | √                 | √             |
| Apolipoprotein D                      | ADGTVNQIEGEATPVnLTEPAK | √                 |               |
| Apolipoprotein H                      | LGnWSAmPSck            | √                 |               |
| Apolipoprotein H                      | VYKPSAGnNSLYR          | √                 |               |
| Attractin isoform 2                   | IDSTGnVTNELR           | √                 |               |
| Beta-2-glycoprotein 1                 | VYKPSAGnNSLYR          |                   | √             |
| Biotinidase                           | FnDTEVLQR              | √                 |               |
| Butyrylcholinesterase                 | DnNSIITR               | √                 |               |
| Butyrylcholinesterase                 | EnETEIIK               | √                 |               |
| Ceruloplasmin                         | EHEGAIYPnnTTnFQR       | √                 | √             |
| Ceruloplasmin                         | EnLTAPGSNSAVFFEQGTR    | √                 | √             |
| Clusterin isoform 2                   | EDALnETR               | √                 |               |
| Clusterin                             | LAnLTQGENQYYLR         | √                 | √             |
| Clusterin isoform 2                   | mFSQnDTR               | √                 |               |
| Clusterin isoform 2                   | KEDALnETR              | √                 |               |
| Coagulation factor XI                 | GINYnSSVAK             | √                 |               |
| Coagulation factor XI                 | VYSGILnQSEIK           | √                 |               |
| Coagulation factor VII (serum proth   | EEQYnSTYR              |                   | √             |
| Complement component 4A               | GLnVTLSSSTGR           | √                 |               |
| Complement component 6                | VLnFTTK                | √                 |               |
| Complement factor H                   | ISEEnETTcYmGK          | √                 | √             |
| Complement factor H                   | mNGASnVTcINSR          | √                 | √             |
| Complement factor I                   | FLNnGTcTAEGK           | √                 |               |
| FLJ00385 protein                      | EEQFnSTFR              |                   | √             |
| Galectin-3-binding protein            | AAIPsALDTnSSK          | √                 |               |
| Haptoglobin isoform 2                 | NLFLnHSEnATAK          | √                 |               |
| Haptoglobin isoform 2                 | VVLHPnYSQVDIGLIK       | √                 |               |
| Hemopexin                             | ALPQPQnVTSLLGcTH       | √                 | √             |
| Heparin cofactor II                   | DFVnASSK               | √                 |               |
| Histone deacetylase 5 isoform 3       | mnSPnESADGmSGR         |                   |               |
| HP protein                            | NLFLnHSEnATAK          |                   | √             |
| HP protein                            | VVLHPnYSQVNIGLIK       |                   | √             |
| Immunoglobulin J chain                | EnISNPTSPLR            | √                 | √             |
| Insulin-like growth factor-binding pr | ALGFEnATQALGR          | √                 |               |
| Inter-alpha globulin inhibitor H2 pol | GAFISnFSmTVDGK         | √                 |               |
| Inter-alpha-trypsin inhibitor heavy c | AnLSSQALQm             |                   | √             |
| Inter-alpha-trypsin inhibitor heavy c | GAFISnFSmTVNGK         |                   | √             |
| Kininogen-1                           | ITYSIVQTncSK           | √                 | √             |
| Kininogen-1                           | LNAENnATFYFK           | √                 | √             |

|                                        |                         |   |   |
|----------------------------------------|-------------------------|---|---|
| Kininogen-1 isoform 2                  | YNSQnQSNNQFVLYR         | √ |   |
| Lymphatic vessel endothelial hyalu     | ANQQLnFTEAK             | √ |   |
| Orosomuroid 1                          | EnGTISR                 | √ |   |
| Paraoxonase 1                          | VTQVYAE nGTVLQGSTVASVYK | √ |   |
| Plasma protease C1 inhibitor           | NPnATSSSSQNPESLQNR      |   | √ |
| Prothrombin                            | GHVnITR                 |   |   |
| Serine (or cysteine) proteinase inhi   | ETFFnLSK                | √ |   |
| Serine (or cysteine) proteinase inhi   | FLnDTmAVYEAK            | √ |   |
| Serine proteinase inhibitor, clade A   | YLGnATAIFFLPDEGK        | √ |   |
| Serpin peptidase inhibitor, clade A,   | TLnQSSDELQLSmGNAmFVK    | √ |   |
| Serpin peptidase inhibitor, clade G    | DTFVnASR                | √ |   |
| Solute carrier family 1 (glial high af | VqnITK                  |   |   |
| Vitronectin                            | nGSLFAFR                | √ |   |
| Vitronectin                            | NnATVHEQVGGPSLTSDLQAQSK | √ |   |

Notes:

Lower case letters: modified amino acids. m for oxidized Met; n for deaminated Asn after PNGase F releasing of (



|   |
|---|
|   |
|   |
|   |
|   |
|   |
|   |
| √ |
|   |
| √ |
| √ |
|   |
| √ |
| √ |
|   |
| √ |

glycans from the formerly N-linked glycosites; c for carboxymethyl Cys
